# Supplementary material for: Artificial Intelligence to Predict the BRAF V595E Mutation in Canine Urinary Bladder Urothelial Carcinomas
Source: MDPI journal article supplement (doi:10.3390/ani13152404), 2023-07-25
Supplement: s1 [file s1]

Table S1: Comparison of AI-based BRAF mutation prediction with confirmed PCR result based on sample quality and specific histomorphological features.

| <b>PCR</b>                                         |          |          |       |                 |
|----------------------------------------------------|----------|----------|-------|-----------------|
| <b>AI prediction (all samples)</b>                 |          |          |       |                 |
|                                                    | Positive | Negative | Total |                 |
| Positive                                           | 40       | 10       | 50    |                 |
| Negative                                           | 29       | 17       | 46    |                 |
| Total                                              | 69       | 27       | 96    | SE 58%, SP 63%  |
| <b>AI prediction (high quality samples)</b>        |          |          |       |                 |
| Positive                                           | 24       | 4        | 28    |                 |
| Negative                                           | 3        | 3        | 6     |                 |
| Total                                              | 27       | 7        | 34    | SE 89%, SP 43%  |
| <b>AI prediction (standard quality samples)</b>    |          |          |       |                 |
| Positive                                           | 7        | 1        | 8     |                 |
| Negative                                           | 8        | 3        | 11    |                 |
| Total                                              | 15       | 4        | 19    | SE 47%, SP 75%  |
| <b>AI prediction (poor quality samples)</b>        |          |          |       |                 |
| Positive                                           | 9        | 5        | 14    |                 |
| Negative                                           | 18       | 11       | 29    |                 |
| Total                                              | 27       | 16       | 43    | SE 33%, SP 69%  |
| <b>AI prediction (classic urothelial only)</b>     |          |          |       |                 |
| Positive                                           | 34       | 8        | 42    |                 |
| Negative                                           | 6        | 2        | 8     |                 |
| Total                                              | 40       | 10       | 50    | SE 85%, SP 20%  |
| <b>AI prediction (non classic urothelial only)</b> |          |          |       |                 |
| Positive                                           | 6        | 2        | 8     |                 |
| Negative                                           | 23       | 15       | 38    |                 |
| Total                                              | 29       | 17       | 46    | SE 21%, SP 88%  |
| <b>AI prediction (invasive only)</b>               |          |          |       |                 |
| Positive                                           | 8        | 2        | 10    |                 |
| Negative                                           | 15       | 9        | 24    |                 |
| Total                                              | 23       | 11       | 34    | SE 35%, SP 82%  |
| <b>AI prediction (non-invasive)</b>                |          |          |       |                 |
| Positive                                           | 16       | 3        | 19    |                 |
| Negative                                           | 3        | 1        | 4     |                 |
| Total                                              | 19       | 4        | 23    | SE 84%, SP 25%  |
| <b>AI prediction (inflammatory)</b>                |          |          |       |                 |
| Positive                                           | 8        | 3        | 11    |                 |
| Negative                                           | 20       | 8        | 28    |                 |
| Total                                              | 28       | 11       | 39    |                 |
| <b>AI prediction (non-inflammatory)</b>            |          |          |       | SE 29%, SP, 73% |
| Positive                                           | 32       | 7        | 39    |                 |
| Negative                                           | 8        | 9        | 17    |                 |
| Total                                              | 40       | 16       | 56    |                 |

**Table S2:** Extension of Table 4. Assessing the AI tool reliability for correct *BRAF* mutation prediction based on specific features across different sample cohorts. A Chi-square test was performed for categorical data (urothelial differentiation, inflammation, slide quality, invasive growth, and mutation status) and a 2-sided t-test for continuous data (sample size). For each feature, p values are indicated for PCR positive and negative cases, as well as separately for true positive and true negative prediction. P values of <0.05 were considered significant (in bold).

| Feature                    | BRAF PCR    | All samples        | Standard and high quality samples only | High quality samples only |
|----------------------------|-------------|--------------------|----------------------------------------|---------------------------|
| Urothelial differentiation | Pos and neg | <b>&lt;0.01</b>    | >0.1                                   | >0.9                      |
|                            | Pos         | <b>&lt;0.00001</b> | <b>&lt;0.001</b>                       | >0.19                     |
|                            | Neg         | <b>&lt;0.001</b>   | <b>&lt;0.006</b>                       | <b>&lt;0.009</b>          |
| Inflammation               | Pos and neg | <b>&lt;0.01</b>    | <b>&lt;0.03</b>                        | >0.7                      |
|                            | Pos         | <b>&lt;0.00001</b> | <b>&lt;0.0005</b>                      | >0.48                     |
|                            | Neg         | >0.38              | >0.15                                  | NA                        |
| Slide quality              | Pos and neg | <b>&lt;0.02</b>    | NA                                     | NA                        |
|                            | Pos         | <b>&lt;0.0001</b>  |                                        |                           |
|                            | Neg         | >0.42              |                                        |                           |
| Sample size (ROI)          | Pos and neg | <b>&lt;0.02</b>    | >0.08                                  | >0.3                      |
|                            | Pos         | <b>&lt;0.003</b>   | >0.09                                  | >0.2                      |
|                            | Neg         | >0.3               | >0.5                                   | >0.9                      |
| Invasive growth            | Pos and neg | >0.08              | >0.3                                   | >0.2                      |
|                            | Pos         | <b>&lt;0.002</b>   | >0.23                                  | >0.28                     |
|                            | Neg         | <b>&lt;0.04</b>    | >0.57                                  | >0.68                     |
| Mutation status (PCR)      | NA          | >0.6               | >0.1                                   | <b>&lt;0.02</b>           |
